# Supplementary material for: The binary, ternary and quaternary mixture toxicity of benzo[a]pyrene, arsenic, cadmium and lead in HepG2 cells
Source: Royal Society of Chemistry journal article supplement (doi:10.1039/c5tx00425j), 2016-01-01
Supplement: c5tx00425j1.pdf [file c5tx00425j1.pdf]

## Supplementary information

### **BINARY, TERNARY AND QUATERNARY MIXTURE TOXICITY OF BENZO[a]PYRENE, ARSENIC, CADMIUM AND LEAD IN HEPG2 CELLS**

Sasikumar Muthusamy<sup>1,2</sup>, Cheng Peng<sup>1,2</sup>, Jack C. Ng<sup>1,2</sup>

<sup>1</sup>The University of Queensland, National Research Centre for Environmental Toxicology  
(Entox), Coopers Plains, Brisbane, QLD 4108, Australia.

<sup>2</sup>CRC CARE, The University of Newcastle, University Drive, Callaghan NSW 2308, Australia.

#### Contents

Table S1. Individual concentrations of benzo[a]pyrene (B[a]P), arsenic (As), cadmium (Cd) and lead (Pb) in mixture toxicity of B[a]P and heavy metal/lloid(s) in HepG2 cells.

**Table S1. Concentrations of benzo[a]pyrene (B[a]P), arsenic (As), cadmium (Cd) and lead (Pb) in mixture toxicity study of B[a]P and heavy metal/loid(s) in HepG2 cells.**

| Type of mixtures               | As (μM)                                        | Cd (μM)                                      | Pb (μM)                                        | B[a]P (μM)                              | Total mixture concentration (μM) |
|--------------------------------|------------------------------------------------|----------------------------------------------|------------------------------------------------|-----------------------------------------|----------------------------------|
| Individual dose response study | 0, 3.125, 6.25, 12.5, 25, 50, 100, 200 and 400 | 0, 0.312, 0.625, 1.25, 2.5, 5, 10, 20 and 40 | 0, 3.125, 6.25, 12.5, 25, 50, 100, 200 and 400 | 0, 1.56, 3.125, 6.25, 12.5, 25, 50, 100 |                                  |
| Binary mixtures                |                                                |                                              |                                                |                                         |                                  |
| As + Cd                        | 150                                            | 2.5                                          |                                                |                                         | 152.5                            |
| As + Pb                        | 150                                            |                                              | 150                                            |                                         | 300                              |
| Cd + Pb                        |                                                | 2.5                                          | 150                                            |                                         | 152.5                            |
| B[a]P + As                     | 150                                            |                                              |                                                | 25                                      | 175                              |
| B[a]P + Cd                     |                                                | 2.5                                          |                                                | 25                                      | 27.5                             |
| B[a]P + Pb                     |                                                |                                              | 150                                            | 25                                      | 175                              |
| Ternary mixtures               |                                                |                                              |                                                |                                         |                                  |
| As + Cd + Pb                   | 150                                            | 2.5                                          | 150                                            |                                         | 302.5                            |
| B[a]P + As + Cd                | 150                                            | 2.5                                          |                                                | 25                                      | 177.5                            |
| B[a]P + As + Pb                | 150                                            |                                              | 150                                            | 25                                      | 325                              |
| B[a]P + Cd + Pb                |                                                | 2.5                                          | 150                                            | 25                                      | 177.5                            |
| Quaternary mixture             |                                                |                                              |                                                |                                         |                                  |
| B[a]P + As + Cd + Pb           | 150                                            | 2.5                                          | 150                                            | 25                                      | 327.5                            |

B[a]P and heavy metal/loid(s) were mixed at 1: 1 ratio based on their  $D_m$  concentration to prepare binary, ternary and quaternary mixtures. Each mixture was serially diluted at 2 fold for 8 times. Treatment was carried in triplicate for each concentration of mixtures and three independent experiments were carried out. Vehicle control (DMSO/or MQ water) is added in triplicate for each mixture study of experiments.
